# Supplementary material for: The Brassica napus Calcineurin B-Like 1/CBL-interacting protein kinase 6 (CBL1/CIPK6) component is involved in the plant response to abiotic stress and ABA signalling
Source: PubMed Central journal article supplement — J Exp Bot. 2012 Oct 15;63(17):6211–22. doi: 10.1093/jxb/ers273 (PMC3481211; doi:10.1093/jxb/ers273), 2012-10-15
Supplement: supp_ers273_jexbot082750_file001.pdf [file supp_ers273_jexbot082750_file001.pdf]

**The *Brassica napus* Calcineurin B-Like 1/CBL-interacting protein kinase 6 (CBL1/CIPK6) component is involved in plant response to abiotic stress and ABA signalling**

*Liang Chen, Feng Ren, Li Zhou, Qing-Qing Wang, Hui Zhong, and Xue-Bao Li*

**Supplementary Data**

## Supplementary data

**Supplementary Table 1. Primer sequences used in this study**

| Name       | Sequence                                 | Function               |
|------------|------------------------------------------|------------------------|
| BnCIPK6 up | 5'-GGGACTAGTATGGTTCGGAGCAAAACCTATAG-3'   | BiFC                   |
| BnCIPK6 dn | 5'-GGGCTCGAGAGCAGGTGTAGTAGAAGTCCAG-3'    | BiFC                   |
| BnCBL1 up  | 5'- CTTGGATCCATGGGCTGCTTCCACTCCAAA -3'   | BiFC                   |
| BnCBL1 dn  | 5'- CTTGGATCCTTTGACAATCTCATCCACCTCC-3'   | BiFC                   |
| BnCIPK6 p1 | 5'-GGAGGCGGCGAAGGTTGGGAATAAGTTTGA-3'     | RT-PCR                 |
| BnCIPK6 p2 | 5'-GGGCTCGAGTCAAGCAGGTGTAGTAGAAGTC-3'    | RT-PCR                 |
| BnCBL1 p1  | 5'- ATCACTACTTAAGATCATGAC -3'            | RT-PCR                 |
| BnCBL1 p2  | 5'- TATGATGTAAGAGAAACAATT -3'            | RT-PCR                 |
| BnACT2 p1  | 5'- GTGTTGTTGGTAGGCCAAGACAT-3'           | RT-PCR                 |
| BnACT2 p2  | 5'- CTTGATGTCTCTTACAATTTCCC-3'           | RT-PCR                 |
| AtACT2 p1  | 5'- GAAATCACAGCACTTGCACC -3'             | RT-PCR                 |
| AtACT2 p2  | 5'- AAGCCTTTGATCTTGAGAGC -3'             | RT-PCR                 |
| RD29A p1   | 5'- TGAAAGGAGGAGGAGGAATGGTTGG -3'        | RT-PCR                 |
| RD29A p2   | 5'- ACAAACACACATAAACATCCAAAGT -3'        | RT-PCR                 |
| RD29B p1   | 5'- CCAGATAGCGGAGGGGAAAGGACAT -3'        | RT-PCR                 |
| RD29B p2   | 5'- AAGTTCACAAACAGAGGCATCATAC -3'        | RT-PCR                 |
| KIN1 p1    | 5'- ACCAACAAGAATGCCTTCCAAGC -3'          | RT-PCR                 |
| KIN1 p2    | 5'- TCCCAACAGTTAATTAGAAAAGG -3'          | RT-PCR                 |
| ABF3 p1    | 5'- CTTTGTGATGGTGTGAGTGAGC -3'           | RT-PCR                 |
| ABF3 p2    | 5'- GTGTTTCCACTATTACCATTGCTG -3'         | RT-PCR                 |
| ABF4 p1    | 5'- AACAACTTAGGAGGTGGTGGTCAT -3'         | RT-PCR                 |
| ABF4 p2    | 5'- TGTAGCAGCTGGCGCAGAAGTCAT -3'         | RT-PCR                 |
| BnCIPK6 F  | 5'- CTTGAATTCATGGTTCGGAGCAAAACCTATAG -3' | pGBKT7<br>construction |
| BnCIPK6 R  | 5'- GGGCTGCAGTCAAGCAGGTGTAGTAGAAGTC -3'  | pGBKT7<br>construction |
| AtCBL1 F   | 5'-CGAATTCATGGGCTGCTTCCACTCAAAGGCAG-3'   | pGADT7<br>construction |
| AtCBL1 R   | 5'-CGGATCCTCATGTGGCAATCTCATCGACCTCC-3'   | pGADT7<br>construction |
| AtCBL2 F   | 5'- CGAATTCATGTCGCAGTGC GTTGAC -3'       | pGADT7<br>construction |
| AtCBL2 R   | 5'- CGAATTCATGTCGCAGTGCATAGACGGTTTC -3'  | pGADT7<br>construction |
| AtCBL3 F   | 5'- CGAATTCATGTCGCAGTGCATAGACGGTTTC -3'  | pGADT7<br>construction |
| AtCBL3 R   | 5'- CGGATCCTCAGGTATCTTCCACCTGCGAGTG -3'  | pGADT7<br>construction |
| AtCBL4 F   | 5'- CCATATGATGGGCTGCTCTGTATCGAAGAAG -3'  | pGADT7                 |

|                            |                                         |                           |
|----------------------------|-----------------------------------------|---------------------------|
| AtCBL4 R                   | 5'-CGAATTCCTTAGGAAGATACGTTTTGCAATTCC-3' | construction<br>pGADT7    |
| AtCBL5 F                   | 5'-CGAATTCATGGGATGTGTTTGCAGCAAGC -3'    | construction<br>pGADT7    |
| AtCBL5 R                   | 5'-CGGATCCTTACCGGAGAAAGGTTGGGAAAATC-3'  | construction<br>pGADT7    |
| AtCBL6 F                   | 5'- CGAATTCATGATGATGCAATGTTTAGATGG -3'  | construction<br>pGADT7    |
| AtCBL6 R                   | 5'- CGGATCCTCATCCATCCAGCTCACTAG -3'     | construction<br>pGADT7    |
| AtCBL7 F                   | 5'- CGAATTCATGGATTCAACAAGAAATTCAGC -3'  | construction<br>pGADT7    |
| AtCBL7 R                   | 5'- CGGATCCTCAGGTATCTTCCACTTGCG -3'     | construction<br>pGADT7    |
| AtCBL8 F                   | 5'- CCATATGATGTTGGCATTTCGTGAAATGC -3'   | construction<br>pGADT7    |
| AtCBL8 R                   | 5'- CGAATTCCTAGTCTTCAACTTCAGAGTCGAG -3' | construction<br>pGADT7    |
| AtCBL9 F                   | 5'- CGAATTCATGGGTTGTTTCCATTCCACG -3'    | construction<br>pGADT7    |
| AtCBL9 R                   | 5'- CGGATCCTCACGTCGCAATCTCGTCC -3'      | construction<br>pGADT7    |
| AtCBL10 F                  | 5'- CCCATGGATGACAACTGGCCGACCAAAT-3'     | construction<br>pGADT7    |
| AtCBL10 R                  | 5'- CGGATCCTCAGTCTTCAACCTCAGTGTT-3'     | construction<br>pGADT7    |
| BnCIPK6 CP1                | 5'- GGAGTTCCACAAGTGTCGTGGAGAAGCCCGT-3'  | Genome walking            |
| BnCIPK6 CP2                | 5'- CGCCACGCTTTTACCCGTTGTTACGTTACG -3'  | Genome walking            |
| BnCIPK6 CP3                | 5'- CACTTTAGCGAATGTCCCGTGGCCTAGAAG-3'   | Genome walking            |
| BnCIPK6<br>Promoter up     | 5'-GGGGTCGACTTTTATCTTCTGTCTTCGTGTA-3'   | Isolate promoter          |
| BnCIPK6<br>Promoter dn     | 5'-GGGGGATCCTGTTTTTTTAAACCAAAAAAAGGG-3' | Isolate promoter          |
| BnCIPK6/BnCI<br>PK6 (M) S  | 5'-CTTCCCGGGATGGTTCGGAGCAAAACCTATAG-3'  | OE vector<br>construction |
| BnCIPK6/BnCI<br>PK6 (M) AS | 5'-GGGCTCGAGTCAAGCAGGTGTAGTAGAAGTC-3'   | OE vector<br>construction |
| BnCBL1 S                   | 5'- CTTGGATCCATGGGCTGCTTCCACTCCAAA -3'  | OE vector<br>construction |
| BnCBL1 AS                  | 5'- GGGGAGCTCTCATTTGACAATCTCATCCAC -3'  | OE vector<br>construction |

**Supplementary Table 2. Identified cDNA clones from the BnCIPK6 yeast two-hybrid screen**

| Clone no. | Homologous genes                                   | Species                     | E-value | Homology         |
|-----------|----------------------------------------------------|-----------------------------|---------|------------------|
| 1         | DNAJ heat shock protein                            | <i>Arabidopsis thaliana</i> | 2e-77   | Id.84%; Po.96%   |
| 2         | CBL3                                               | <i>Arabidopsis thaliana</i> | 2e-100  | Id.98%; Po.99%   |
| 3         | fms interacting protein                            | <i>Ricinus communis</i>     | 6e-46   | Id.60%; Po.77%   |
| 4         | putative alpha/beta hydrolase                      | <i>Arabidopsis thaliana</i> | 5e-62   | Id.92%; Po.96%   |
| 5         | polyubiquitin UBQ14                                | <i>Cucumis sativus</i>      | 3e-26   | Id.100%; Po.100% |
| 6         | metal ion binding                                  | <i>Brassica rapa</i>        | 1e-33   | Id.97%; Po.98%   |
| 7         | TCP-1 chaperonin-like protein                      | <i>Arabidopsis thaliana</i> | 3e-88   | Id.98%; Po.100%  |
| 8         | AtITPK4(inositol 1,3,4-trisphosphate 5/6-kinase 4) | <i>Arabidopsis thaliana</i> | 4e-46   | Id.88%; Po.94%   |
| 9         | F-box family protein                               | <i>Arabidopsis lyrata</i>   | 3e-51   | Id.59%; Po.67%   |
| 10        | MYB3                                               | <i>Arabidopsis thaliana</i> | 3e-19   | Id.66%; Po.69%   |
| 11        | APG8 activating enzyme                             | <i>Arabidopsis thaliana</i> | 1e-48   | Id.95%; Po.99%   |
| 12        | ATP binding / metal ion binding                    | <i>Arabidopsis thaliana</i> | 6e-78   | Id.95%; Po.97%   |
| 13        | Putative xylan endohydrolase                       | <i>Arabidopsis thaliana</i> | 1e-24   | Id.88%; Po.96%   |
| 14        | unknown protein                                    | <i>Arabidopsis thaliana</i> | 1e-36   | Id.79%; Po.86%   |
| 15        | hypothetical protein                               | <i>Arabidopsis lyrata</i>   | 9e-32   | Id. 97%; Po.98%  |
| 16        | chaperone protein dnaJ-related                     | <i>Arabidopsis thaliana</i> | 2e-60   | Id. 81%; Po.88%  |
| 17        | plastid-lipid associated protein PAP2              | <i>Brassica rapa</i>        | 1e-77   | Id.100%; Po.100% |
| 18        | phospholipase A2-alpha                             | <i>Arabidopsis lyrata</i>   | 1e-46   | Id.89%; Po.93%   |
| 19        | acyl-CoA thioesterase                              | <i>Ricinus communis</i>     | 4e-43   | Id.76%; Po.87%   |
| 20        | Soybean gene regulated by cold-2                   | <i>Arabidopsis thaliana</i> | 1e-73   | Id.91%; Po.94%   |
| 21        | putative phosphoglucomutase                        | <i>Arabidopsis thaliana</i> | 3e-46   | Id.95%; Po.98%   |
| 22        | SNF1 kinase homolog 10                             | <i>Arabidopsis thaliana</i> | 2e-64   | Id.87%; Po.92%   |
| 23        | phosphoribulokinase                                | <i>Arabidopsis thaliana</i> | 7e-96   | Id.97%; Po.99%   |
| 24        | cytokinin dehydrogenase                            | <i>Arabidopsis thaliana</i> | 4e-70   | Id.91%; Po.95%   |
| 25        | ubiquitin-protein ligase                           | <i>Arabidopsis thaliana</i> | 3e-74   | Id.94%; Po.97%   |
| 26        | C2 domain-containing protein                       | <i>Noccaea caerulea</i>     | 4e-13   | Id.84%; Po.93%   |
| 27        | calcineurin B-like protein 1                       | <i>Brassica oleracea</i>    | 8e-117  | Id.99%; Po.100%  |

**Supplementary Table 3. Statistical analysis of relative green leaves and relative fresh weight of *BnCIPK6* and *BnCIPK6M* transgenic *Arabidopsis* under a range of NaCl concentrations.**

| NaCl<br>Concentration | Relative green leaves (%) |            |            |         |         | Relative fresh weight (mg) |            |            |            |           |
|-----------------------|---------------------------|------------|------------|---------|---------|----------------------------|------------|------------|------------|-----------|
|                       | WT                        | BnCIPK6(M) | BnCIPK6(M) | BnCIPK6 | BnCIPK6 | WT                         | BnCIPK6(M) | BnCIPK6(M) | BnCIPK6    | BnCIPK6   |
|                       |                           | L8         | L9         | L3      | L6      |                            | L8         | L9         | L3         | L6        |
| 75 mM                 | 95±2                      | 95±3       | 96±2       | 96±3    | 95±4    | 29.1±1.6                   | 31.4±2.4   | 34.3±2.8*  | 32.1±2.6   | 30.1±2.1  |
| 150mM                 | 65±4                      | 81±3**     | 85±4**     | 82±3**  | 80±3**  | 20.1±1.2                   | 24.7±1.4*  | 29.0±2.1** | 25.2±1.5** | 22.7±1.2* |
| 170mM                 | 25±3                      | 62±5**     | 75±8**     | 70±7**  | 35±6**  | 17.6±1.5                   | 21.4±1.7** | 28.5±3.1** | 22.4±1.3** | 20.5±1.3* |
| 200mM                 | 18±3                      | 48±4**     | 60±6**     | 53±6**  | 28±3**  | 12.5±2.4                   | 17.1±1.5** | 21.1±2.6** | 18.4±1.9** | 16.1±1.0* |
| 250mM                 | 4±1                       | 6±2        | 8±4        | 5±4     | 4±1     | -                          | -          | -          | -          | -         |

Independent t-tests for equality of means demonstrated that there was significant difference (\* P value < 0.05) or very significant difference (\*\* P value < 0.01) between wild type and transgenic plants.

**Supplementary Table 4. Statistical analysis of relative green leaves and relative fresh weight of *BnCBL1* transgenic *Arabidopsis* under a range of NaCl concentrations.**

| NaCl<br>Concentration | Relative green leaves (%) |                   |                   | Relative fresh weight (mg) |                   |                   |
|-----------------------|---------------------------|-------------------|-------------------|----------------------------|-------------------|-------------------|
|                       | WT                        | <b>BnCBL1 L10</b> | <b>BnCBL1 L11</b> | WT                         | <b>BnCBL1 L10</b> | <b>BnCBL1 L11</b> |
| 75 mM                 | 95±2                      | 95±3              | 96±2              | 29.1±1.6                   | 33.2±1.4*         | 30.5±1.9          |
| 150mM                 | 65±4                      | 82±2**            | 79±4**            | 20.1±1.2                   | 28.3±2.6**        | 23.8±1.7*         |
| 170mM                 | 25±3                      | 63±5**            | 41±5**            | 17.6±1.5                   | 26.5±2.0**        | 21.2±1.3**        |
| 200mM                 | 18±3                      | 42 ±4**           | 29 ±3**           | 12.5±2.4                   | 18.5±2.5**        | 16.7±1.5 **       |
| 250mM                 | 4±1                       | 5±2               | 4±1               | -                          |                   |                   |

Independent t-tests for equality of means demonstrated that there was significant difference (\* P value < 0.05) or very significant difference (\*\* P value < 0.01) between wild type and transgenic plants.

**Supplementary Table 5. Statistical analysis of the primary root length (cm) of *BnCIPK6* and *BnCIPK6M* transgenic *Arabidopsis* under a range of ABA concentrations.**

| Genotype     | 0 $\mu$ M ABA   | 0.25 $\mu$ M ABA | 0.5 $\mu$ M ABA   | 0.75 $\mu$ M ABA  | 1 $\mu$ M ABA     |
|--------------|-----------------|------------------|-------------------|-------------------|-------------------|
| WT           | 2.03 $\pm$ 0.2  | 1.73 $\pm$ 0.2   | 1.30 $\pm$ 0.14   | 1.21 $\pm$ 0.15   | 1.10 $\pm$ 0.1    |
| BnCIPK6(M)L8 | 1.95 $\pm$ 0.2  | 1.35 $\pm$ 0.1*  | 0.90 $\pm$ 0.1**  | 0.85 $\pm$ 0.11** | 0.80 $\pm$ 0.09** |
| BnCIPK6(M)L9 | 1.98 $\pm$ 0.18 | 1.30 $\pm$ 0.15* | 0.84 $\pm$ 0.08** | 0.74 $\pm$ 0.08** | 0.69 $\pm$ 0.08** |
| BnCIPK6L3    | 1.98 $\pm$ 0.18 | 1.43 $\pm$ 0.1   | 1.09 $\pm$ 0.1*   | 0.99 $\pm$ 0.05*  | 0.95 $\pm$ 0.12*  |
| BnCIPK6L6    | 2.0 $\pm$ 0.2   | 1.51 $\pm$ 0.2   | 1.15 $\pm$ 0.11*  | 1.06 $\pm$ 0.10*  | 1.02 $\pm$ 0.1*   |

Independent t-tests for equality of means demonstrated that there was significant difference (\* P value < 0.05) or very significant difference (\*\* P value < 0.01) between wild type and transgenic plants.

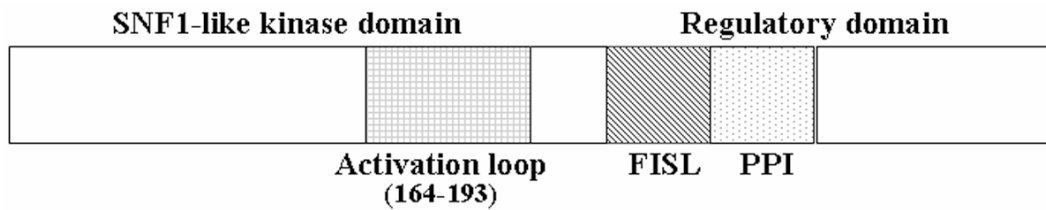

**Supplementary Fig 1. A schematic diagram of the domain structure of BnCIPK6.**

The overall structure of BnCIPK6 comprises an N-terminal kinase domain and a regulatory C-terminal domain that are separated by a junction domain. Within the kinase domain, phosphorylation of amino acids in the activation loop (indicated as a box, 164-193aa) results in kinase activation. The regulatory C-terminal domain contains two conserved interaction domains, the FISL domain (also called NAF domain), which is responsible for the CBL–CIPK interaction, and the adjacent protein–phosphatase interaction (PPI) domain mediating interaction with 2C-type protein phosphatase (PP2C)-type phosphatases.



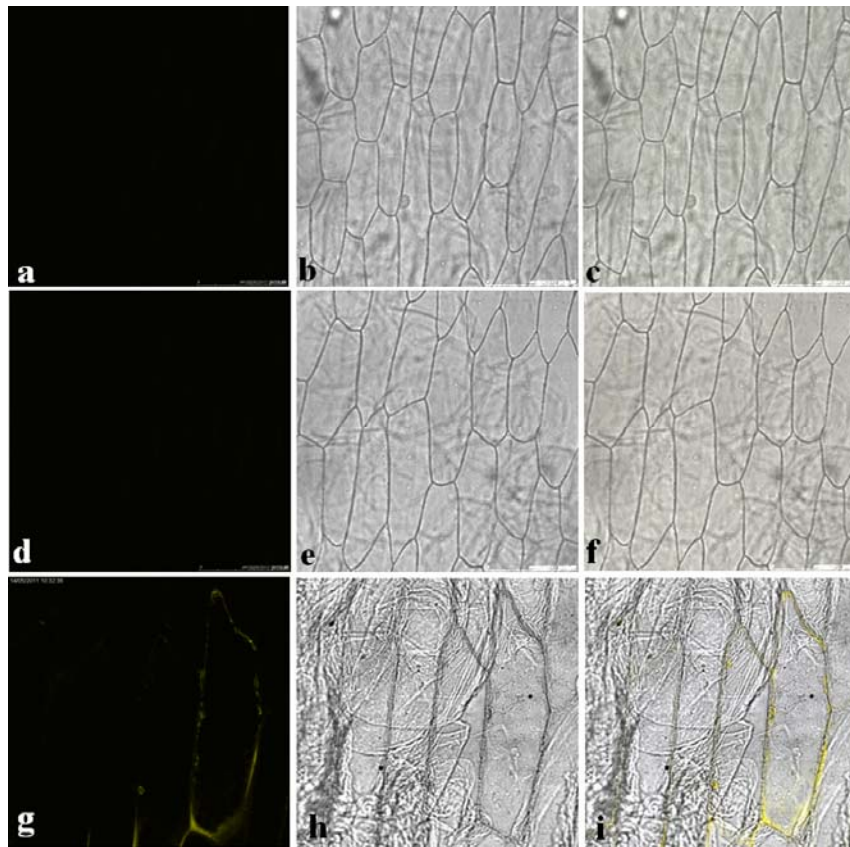

**Supplementary Fig 2.** BiFC assays of BnCIPK6 interaction with BnCBL1 in onion cells. (a) to (c) pUC-SPYNE and pUC-SPYCE-BnCIPK6; (d) to (f) pUC-SPYNE-BnCBL1+pUC-SPYCE; (g) to (i) pUC-SPYNE-BnCIPK6+pUC-SPYCE-BnCBL1. (a, d, g) YFP fluorescent Images; (b, e, h) Bright field Images of images a, d and g; (c, f, i) Fluorescent Images merged with their bright-field Images.

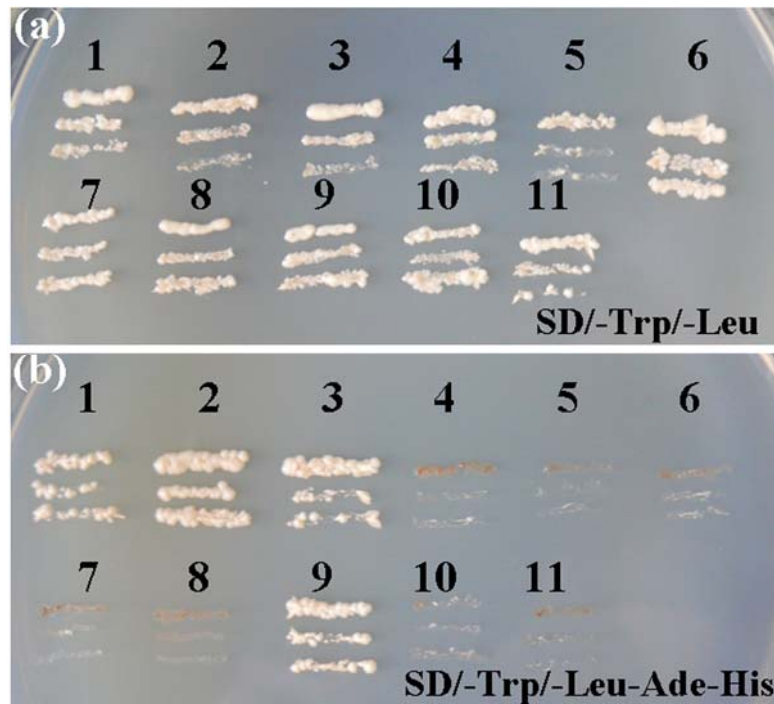

**Supplementary Fig 3. Yeast two-hybrid analysis for interactions between BnCIPK6 and Ten AtCBL proteins.** BnCIPK6 can interact with AtCBL1, AtCBL2, AtCBL3 and AtCBL9. **(a)** Transformants were assayed for growth on QDO nutritional selection medium (SD/-Trp/-Leu-Ade-His). **(b)** Transformants were assayed for growth on selection medium (SD/-Trp/-Leu). 1-10, AtCBL1-AtCBL10; 11 AD (empty).

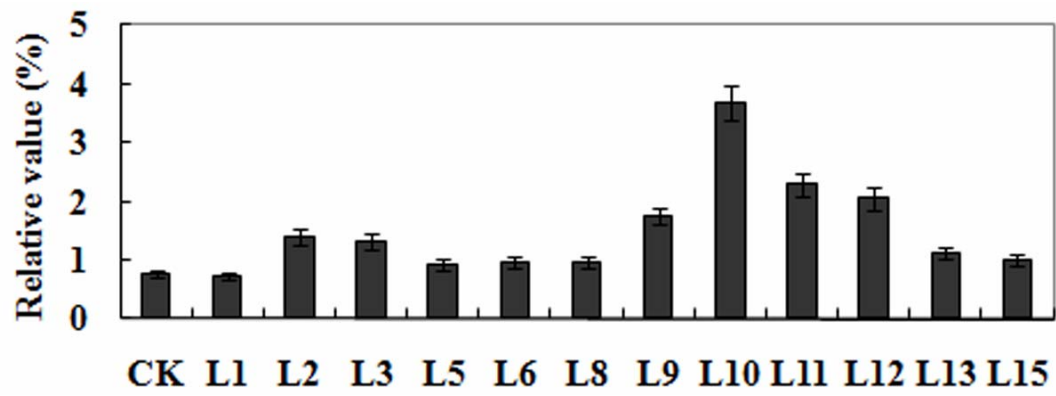

**Supplementary Fig 4.** Quantitative RT-PCR analysis of *BnCBL1* expression in the transgenic Arabidopsis. CK, wild type; L1 – L15, *BnCBL1* transgenic lines.

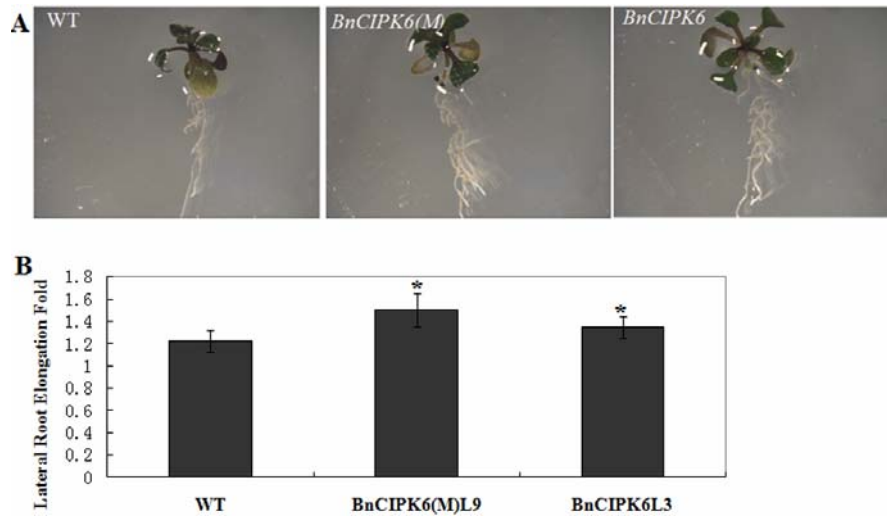

**Supplementary Fig 5.** Assay of lateral roots elongation of *BnCIPK6* and *BnCIPK6M* transgenic plants growing on low phosphate medium. (A) Comparison of the later roots between *BnCIPK6/6M* transgenic plants and wild type. (B) Statistical analysis of lateral root elongation. WT, wild type; BnCIPK6L3, *BnCIPK6* transgenic line 3; BnCIP6(m)L9, *BnCIPK(M)* transgenic line 9. Independent *t*-tests for equality of means demonstrated that there was significant difference (\* P value < 0.05) between wild type and *BnCIPK6/6M* transgenic lines.

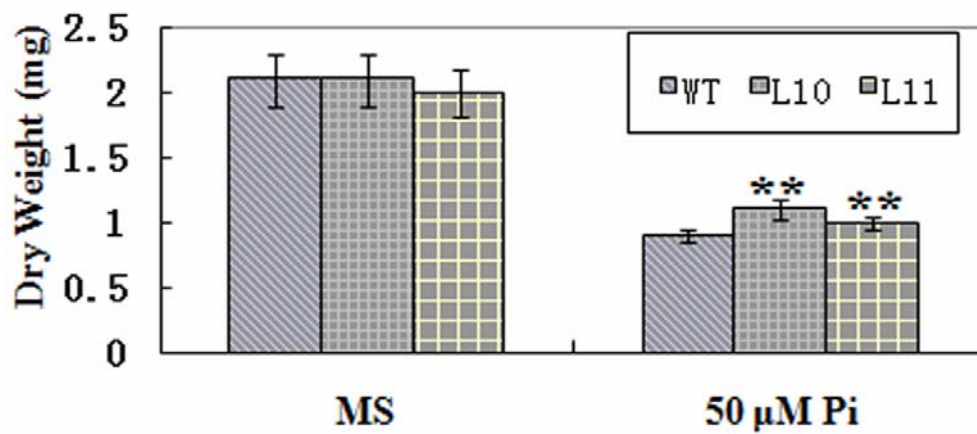

**Supplementary Fig 6.** Statistical analysis of plant dry weight of *BnCBL1* transgenic plants under phosphorous starvation. WT, wild type; L10 and L11, transgenic line 10 and 11. Independent *t*-tests for equality of means demonstrated that there was very significant difference (\*\* P value < 0.01) between wild type and *BnCBL1* transgenic lines.

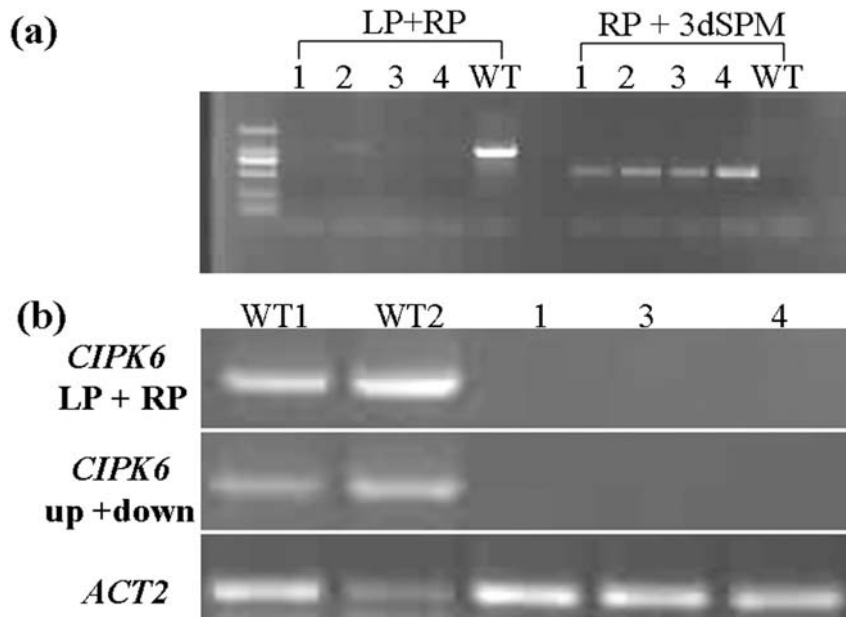

**Supplementary Fig 7. Identification of *cipk6* loss-of-function mutants.** (a) The homozygous insertion mutant *cipk6* was isolated by PCR-based screening using *CIPK6*-specific primers and a transposon specific primer (3' dSpm). (b), RT-PCR analysis of *CIPK6* expression in wild-type plants and homozygous mutants line1, 3 and 4. *Actin2* served as control. LP and RP, left and right genomic primers for the *CIPK6* gene, respectively; up and down, *AtCIPK6* full-length cDNA primers; WT, wild type; 1-4, *cipk6* line1-4.

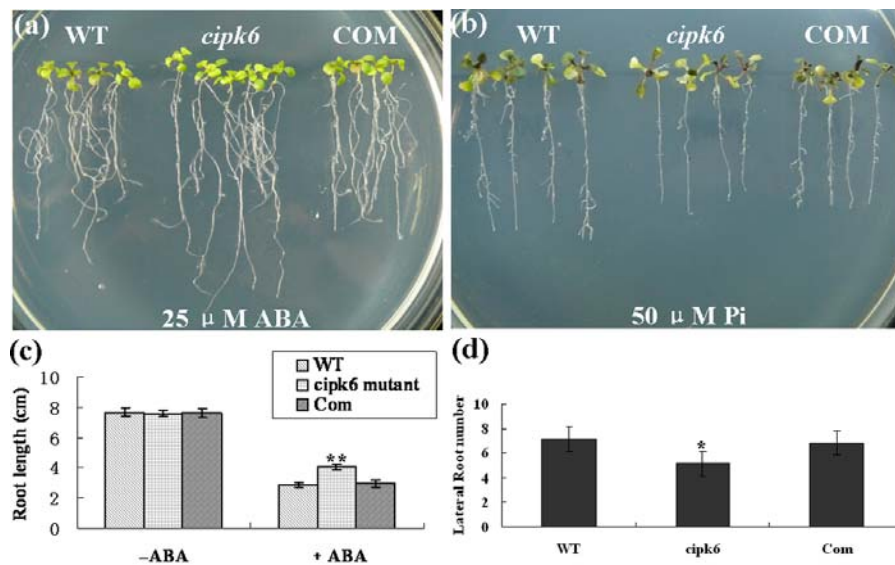

**Supplementary Fig 8. Characterization of *Arabidopsis cipk6* knockout mutant expressing *BnCIPK6*.** (a) Six-old-day seedlings were transferred and grew on MS medium with 25 μM ABA (b) Six-old-day seedlings were transferred and grew on MS medium with 50 μM phosphate (low phosphate, LP). (c) Statistical analysis of the root length of wild type, the *cipk6* mutant and the *cipk6/BnCIPK6* complemented transgenic lines (COM) grown on MS medium without (-ABA) or with 25 μM ABA for two weeks after transferring. (d) Statistical analysis of the lateral root number of wild type, the *cipk6* mutant and the *cipk6/BnCIPK6* complemented transgenic lines (COM) grown on low phosphate medium (50 μM Pi). Mean values and standard errors (bar) were shown from three independent experiments (n>50 seedlings per each line). Independent *t*-tests for equality of means demonstrated that there was significant difference (\* P value < 0.05) or very significant difference (\*\* P value < 0.01) between wild type, the *cipk6* mutant and the *cipk6/BnCIPK6* complemented transgenic lines (COM).
